# Supplementary material
Source: Springer Nature journal article supplement (https://www.springermedizin.de/resource/supplementary/12879_2011_1682_MOESM1_ESM.pdf/9443104)

**CT request**  
(national/  
international)

1

RIVM/  
NFP

2

GGD  
K'land

3

**Airline**  


6

5

4

**Passengerlist**  
(incomplete  
data)

**Ewrs/NFP,**  
international contacts

**MHS NL, Dutch**  
contacts

7

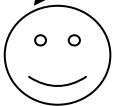

8

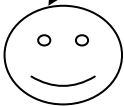

Supplement: MOESM1 [file 9443104]
